# Supplementary material for: Synthesis of NaA Zeolite Membranes with High Water Flux on Macroporous Si 3 N 4
Source: Royal Society of Chemistry journal article supplement (doi:10.1039/d5ce01075f), 2026-01-01
Supplement: d5ce01075f1.pdf [file d5ce01075f1.pdf]

## Supporting Information

### Synthesis of NaA Zeolite Membranes with High Water Flux on Macroporous $\text{Si}_3\text{N}_4$

*Chaochen Zou<sup>a, b</sup>, Yongfeng Xia<sup>a</sup>, Dongxu Yao<sup>a</sup>, Ming Zhu<sup>a</sup>, Jun Zhao<sup>a</sup>, Rui Yao<sup>c, \*\*</sup>,*

*Yu-Ping Zeng<sup>a, \*</sup>*

<sup>a</sup> State Key Laboratory of High-Performance Ceramics and Superfine Microstructure,  
Shanghai Institute of Ceramics, Chinese Academy of Sciences, Shanghai 200050,  
China

<sup>b</sup> Center of Materials Science and Optoelectronics Engineering, University of Chinese  
Academy of Sciences, Beijing 100049, China

<sup>c</sup> School of Materials Science and Chemical Engineering, Ningbo University, Ningbo,  
315211, China

\* Corresponding author.

\*\* Corresponding author.

E-mail address: yaorui@nbu.edu.cn (R. Yao), yuping-zeng@mail.sic.ac.cn (Y.P.  
Zeng).

**Full postal address: Shanghai Institute of Ceramics, 585 Heshuo Road, Jiading  
District, Shanghai, China**

## Table of Contents

|                                                                                                                                                                                                                                                                                                                                                                                                                                                                                                  |   |
|--------------------------------------------------------------------------------------------------------------------------------------------------------------------------------------------------------------------------------------------------------------------------------------------------------------------------------------------------------------------------------------------------------------------------------------------------------------------------------------------------|---|
| Text S1: Raw materials.....                                                                                                                                                                                                                                                                                                                                                                                                                                                                      | 4 |
| Text S2: Preparation of the LTA membrane on porous alumina .....                                                                                                                                                                                                                                                                                                                                                                                                                                 | 4 |
| Fig. S1. Surface SEM images illustrating the sequential steps of the double-layer seeding process on Si <sub>3</sub> N <sub>4</sub> supports: (a) after deposition of the primary seed layer using 1.91 μm seeds (2 wt.% suspension); (b) the primary-seeded support after removal of loosely seeds by swabbing; (c) the final double-layer structure, consisting of the swabbed primary layer (1.91 μm seeds) overlaid with a secondary seed layer of 0.71 μm seeds (0.25 wt.% suspension)..... | 4 |
| Fig. S2. Schematic diagram of the PV test apparatus for NaA zeolite membranes. ....                                                                                                                                                                                                                                                                                                                                                                                                              | 5 |
| Fig. S3. The cross-sectional SEM images of seeded layer on macroporous Si <sub>3</sub> N <sub>4</sub> by using (a) 1.91 μm, (b) 0.71 μm and (c) 0.47 μm NaA crystals as top seeds.....                                                                                                                                                                                                                                                                                                           | 5 |
| Fig. S4. Surface SEM image of NaA zeolite membrane (W4) prepared with 0.5 wt.% NaA seed suspension. ....                                                                                                                                                                                                                                                                                                                                                                                         | 5 |
| Fig. S5. Surface and cross-sectional SEM images of NaA zeolite membranes prepared with different crystallization times: (a)-(f) Surface SEM images; (g)-(l) Cross-sectional SEM images. Herein, T6, T7, T8, T9, T11, and T12 correspond to crystallization times of 3h, 3.5 h, 4 h, 4.5 h, 5.5 h, and 6 h, respectively. ....                                                                                                                                                                    | 6 |
| Fig. S6. Surface SEM image of zeolite membrane on unseeded bare Si <sub>3</sub> N <sub>4</sub> support (Sample B1) (a) and XRD patterns of samples B1 and Q5 (b).....                                                                                                                                                                                                                                                                                                                            | 6 |
| Fig. S7. SEM image of NaA zeolite membrane Q1 after pervaporation test.....                                                                                                                                                                                                                                                                                                                                                                                                                      | 6 |

|                                                                                                                                             |          |
|---------------------------------------------------------------------------------------------------------------------------------------------|----------|
| <b>Fig. S8. Surface SEM image of porous alumina (a) and cross-sectional SEM image of NaA zeolite membrane M8 on porous alumina (b).....</b> | <b>7</b> |
| <b>Fig. S9. Cross-sectional SEM image of NaA zeolite membrane M10 on porous alumina.....</b>                                                | <b>7</b> |
| <b>Fig. S10. SEM image of NaA crystals isolated from the synthesis gel used in preparing membrane Q5. ....</b>                              | <b>7</b> |
| <b>Table S1. Atomic concentration of NaA crystals isolated from the synthesis gel used in preparing membrane Q5. ....</b>                   | <b>8</b> |

## Text S1: Raw materials

The chemicals employed in this work comprised tetraethyl orthosilicate (TEOS,  $\text{SiO}_2 \geq 28\text{wt.}\%$ , Shanghai Lingfeng Chemical Reagent Co., Ltd.), sodium aluminate with 98% purity (Shanghai Aladdin Biochemical Technology Co., Ltd.), sodium hydroxide (NaOH) with 96% purity (Sinopharm Chemical Reagent Co., Ltd). And the reagents used for porous  $\text{Si}_3\text{N}_4$  support included ethanol (AR, purity  $\geq 99.7\text{ wt.}\%$ , Shanghai Titan Scientific Co., Ltd.), Commercial  $\text{Si}_3\text{N}_4$  powder (purity  $\geq 99.99\text{ wt.}\%$ ;  $\alpha$ -phase  $\geq 95.5\text{ wt.}\%$ ;  $d_{50} = 0.7\text{ }\mu\text{m}$ , Qingdao Cixing New Materials Co., Ltd, China),  $\text{Y}_2\text{O}_3$  ( $d_{50} = 5\text{ }\mu\text{m}$ , purity  $\geq 99.9\text{ wt.}\%$ , Yuelong Co., Ltd.), and polyvinyl butyral (purity  $\geq 99\text{ wt.}\%$ , Sinopharm Chemical Reagent Co., Ltd., Shanghai, China).

## Text S2: Preparation of the LTA membrane on porous alumina

The porous alumina was prepared by dry press pressing at 20 MPa. The ceramic slurry was first obtained by mechanically mixing commercial  $\text{Al}_2\text{O}_3$  powder (Indonesia Chemical Alumina, A-12-40M), 2 wt.% polyvinyl butyral, and ethanol. The mixture was then dried at  $80^\circ\text{C}$  and sieved through an 80-mesh screen. After pressing, the green bodies were dewaxed at  $600^\circ\text{C}$  in air for 2 h and sintered in air at  $1600^\circ\text{C}$  for 2 h. The resulting porous  $\text{Al}_2\text{O}_3$  exhibited a porosity of 38% and a mean pore diameter of  $1.57\text{ }\mu\text{m}$ . All supports were polished with 1200-grit sandpaper to reduce surface roughness. The seeding procedure was identical to that employed for the silicon nitride supports, as detailed in Section 2.3, involving a bottom seed layer of  $1.91\text{ }\mu\text{m}$  and a top seed layer of  $0.47\text{ }\mu\text{m}$ . Hydrothermal synthesis was carried out following the same protocol used for membrane Q3 (Section 2.3). Under these consistent conditions, a total of seven membranes—designated M8 through M14—were fabricated.

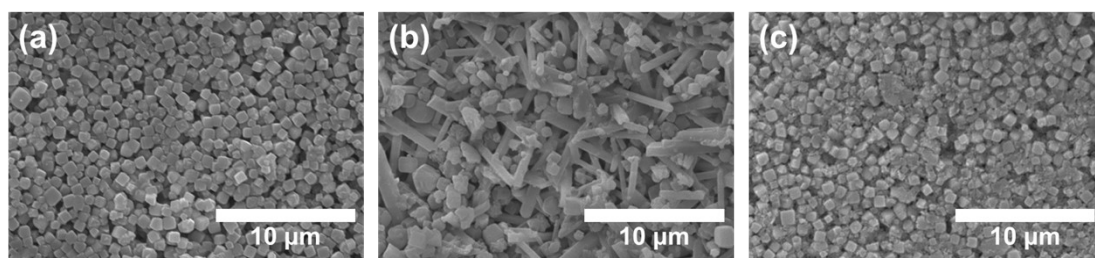

**Fig. S1. Surface SEM images illustrating the sequential steps of the double-layer seeding process on  $\text{Si}_3\text{N}_4$  supports: (a) after deposition of the primary seed layer using  $1.91\text{ }\mu\text{m}$  seeds (2 wt.% suspension); (b) the primary-seeded support after**

removal of loosely seeds by swabbing; (c) the final double-layer structure, consisting of the swabbed primary layer (1.91  $\mu\text{m}$  seeds) overlaid with a secondary seed layer of 0.71  $\mu\text{m}$  seeds (0.25 wt.% suspension).

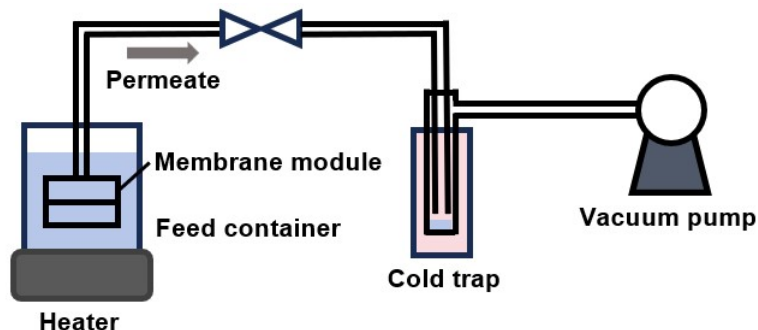

**Fig. S2.** Schematic diagram of the PV test apparatus for NaA zeolite membranes.

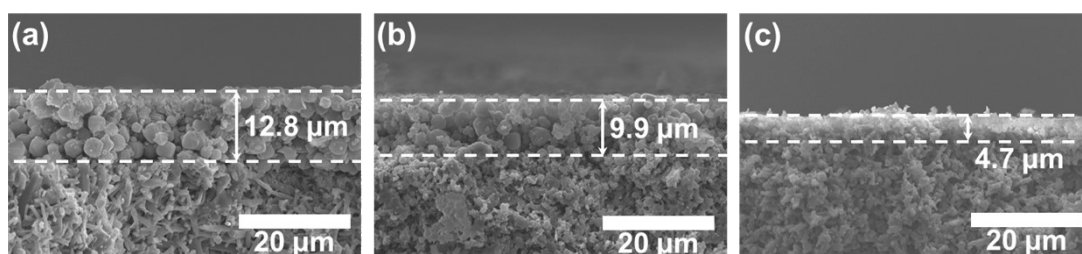

**Fig. S3.** The cross-sectional SEM images of seeded layer on macroporous  $\text{Si}_3\text{N}_4$  by using (a) 1.91  $\mu\text{m}$ , (b) 0.71  $\mu\text{m}$  and (c) 0.47  $\mu\text{m}$  NaA crystals as top seeds.

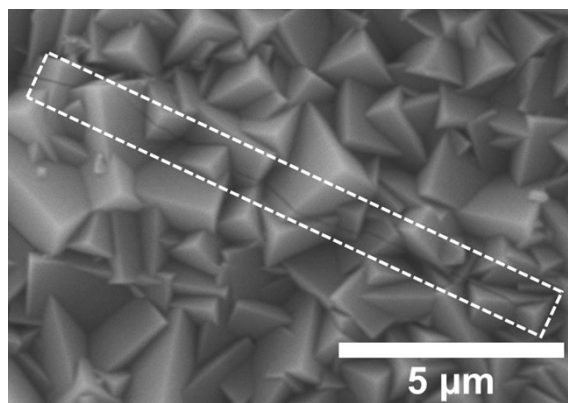

**Fig. S4.** Surface SEM image of NaA zeolite membrane (W4) prepared with 0.5 wt.% NaA seed suspension.

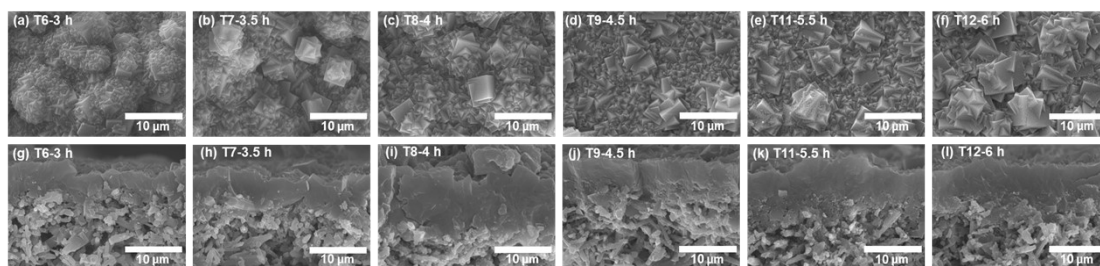

**Fig. S5.** Surface and cross-sectional SEM images of NaA zeolite membranes prepared with different crystallization times: (a)-(f) Surface SEM images; (g)-(l) Cross-sectional SEM images. Herein, T6, T7, T8, T9, T11, and T12 correspond to crystallization times of 3h, 3.5 h, 4 h, 4.5 h, 5.5 h, and 6 h, respectively.

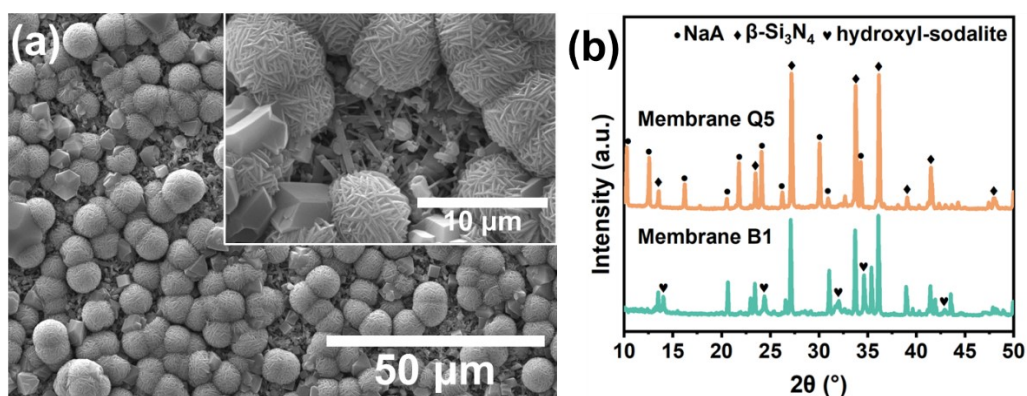

**Fig. S6.** Surface SEM image of zeolite membrane on unseeded bare  $\text{Si}_3\text{N}_4$  support (Sample B1) (a) and XRD patterns of samples B1 and Q5 (b).

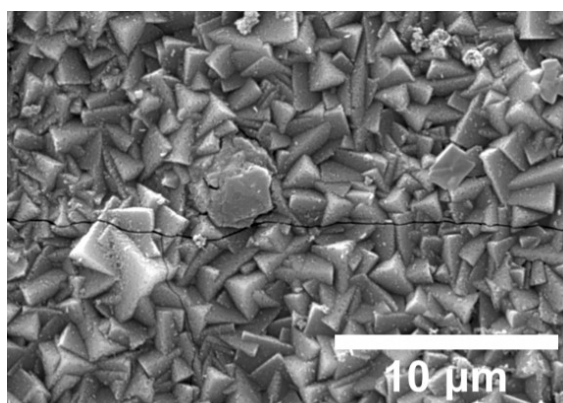

**Fig. S7.** SEM image of NaA zeolite membrane Q1 after pervaporation test.

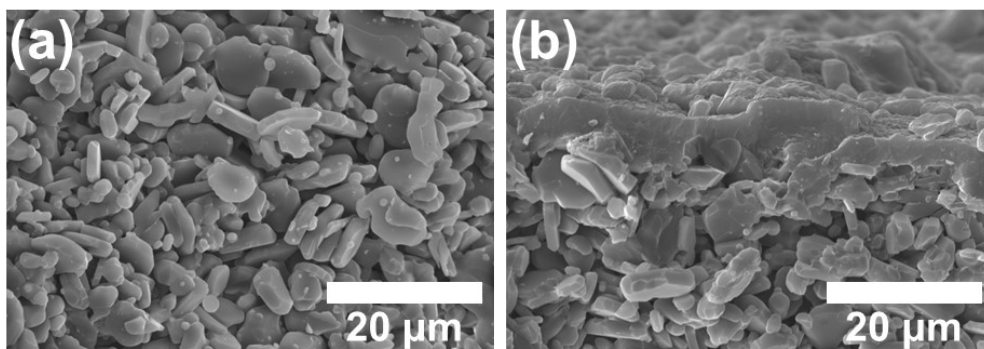

**Fig. S8.** Surface SEM image of porous alumina (a) and cross-sectional SEM image of NaA zeolite membrane M8 on porous alumina (b).

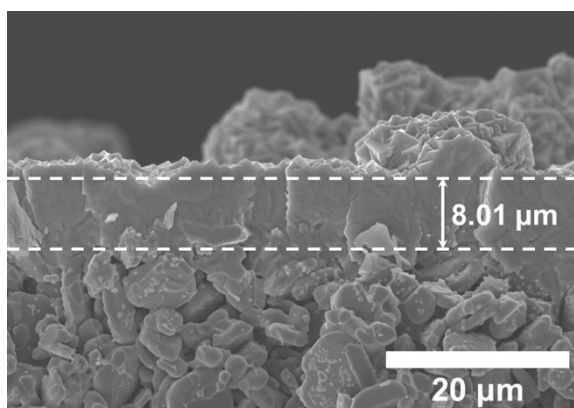

**Fig. S9.** Cross-sectional SEM image of NaA zeolite membrane M10 on porous alumina.

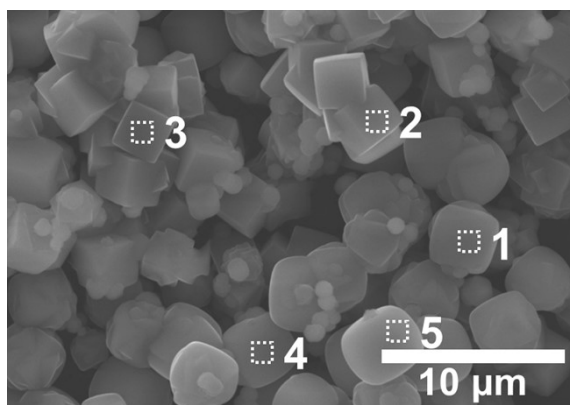

**Fig. S10.** SEM image of NaA crystals isolated from the synthesis gel used in preparing membrane Q5.

**Table S1. Atomic concentration of NaA crystals isolated from the synthesis gel used in preparing membrane Q5.**

| Spectrum | Oxygen (O) | Sodium (Na) | Alumina (Al) | Silica (Si) | Si/Al |
|----------|------------|-------------|--------------|-------------|-------|
| 1        | 64.04      | 12.42       | 11.74        | 11.80       | 1.01  |
| 2        | 66.84      | 11.01       | 10.96        | 11.19       | 1.02  |
| 3        | 59.58      | 13.45       | 14.17        | 12.80       | 0.90  |
| 4        | 62.84      | 14.15       | 11.57        | 11.43       | 0.99  |
| 5        | 63.97      | 12.27       | 11.85        | 11.91       | 1.01  |
| Mean     | 63.45      | 12.66       | 12.06        | 11.83       | 0.98  |
| Sigma    | 2.62       | 1.20        | 1.23         | 0.62        | 0.05  |
